# Supplementary material
Source: ML conference proceedings conference paper supplement (https://proceedings.neurips.cc/paper_files/paper/2023/hash/37094fdc81632915a5738293cf9b7ad4-Abstract.html)
Supplement: Supplementary file 1 [file 37094fdc81632915a5738293cf9b7ad4-Supplemental-Conference.zip]

Archive with 4 entries (4 files):
- code & data.zip
- __MACOSX/._code & data.zip
- Supplementary Material.pdf
- __MACOSX/._Supplementary Material.pdf
